# Supplementary material for: The ratio of nicotinic acid to nicotinamide as a microbial biomarker for assessing cell therapy product sterility
Source: PubMed Central journal article supplement — Mol Ther Methods Clin Dev. 2022 Apr 13;25:410–24. doi: 10.1016/j.omtm.2022.04.006 (PMC9065052; doi:10.1016/j.omtm.2022.04.006), 2022-04-13
Supplement: mmc1.pdf [file mmc1.pdf]

**OMTM, Volume 25**

**Supplemental information**

**The ratio of nicotinic acid to nicotinamide  
as a microbial biomarker for assessing  
cell therapy product sterility**

**Jiayi Huang, Liang Cui, Meenubharathi Natarajan, Paul W. Barone, Jacqueline M. Wolfrum, Yie Hou Lee, Scott A. Rice, and Stacy L. Springs**

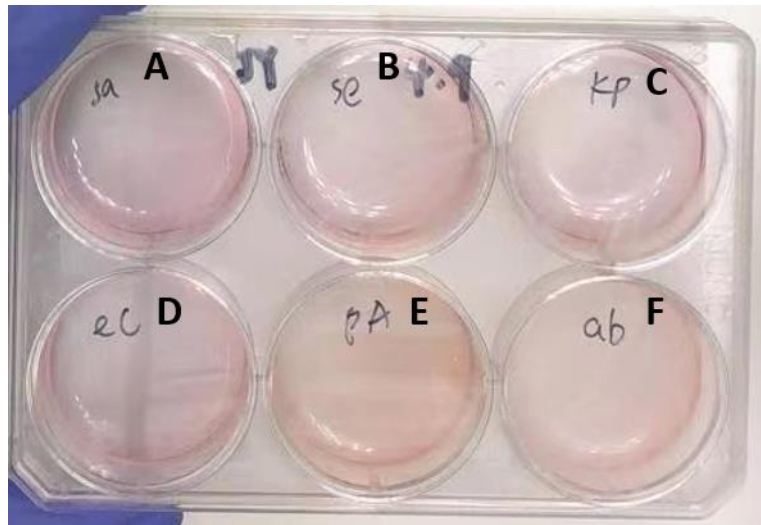

**Figure S1.** Medium colour changes after MSCs have been contaminated with  $1 \times 10^4$  CFU/mL of (A) *S. aureus*, (B) *S. epidermidis*, (C) *K. pneumoniae*, (D) *E. coli*, (E) *P. aeruginosa*, and (F) *A. baumannii* for 24 h.

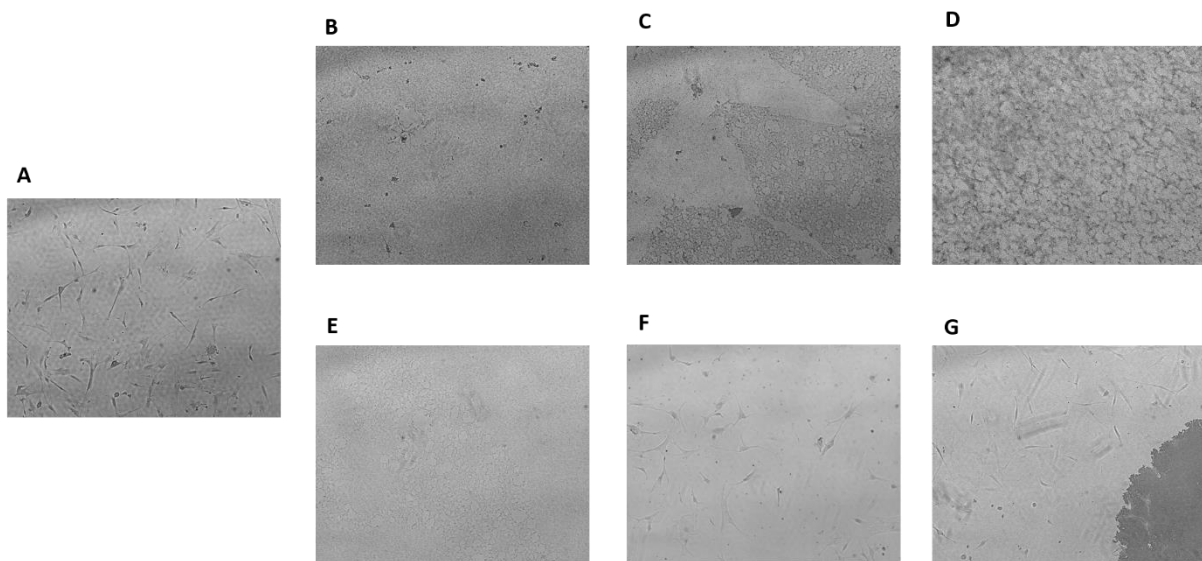

**Figure S2.** MSCs contaminated with six different bacteria for 24 h.  $1 \times 10^5$  MSCs were contaminated with (A) no bacteria, (B) *A. baumannii*, (C) *E. coli*, (D) *K. pneumoniae*, (E) *P. aeruginosa*, (F) *S. aureus* and (G) *S. epidermidis*. The numbers of bacteria used for the contamination study was approximately  $1 \times 10^4$  CFU/mL. Magnification was 4 X in all panels.



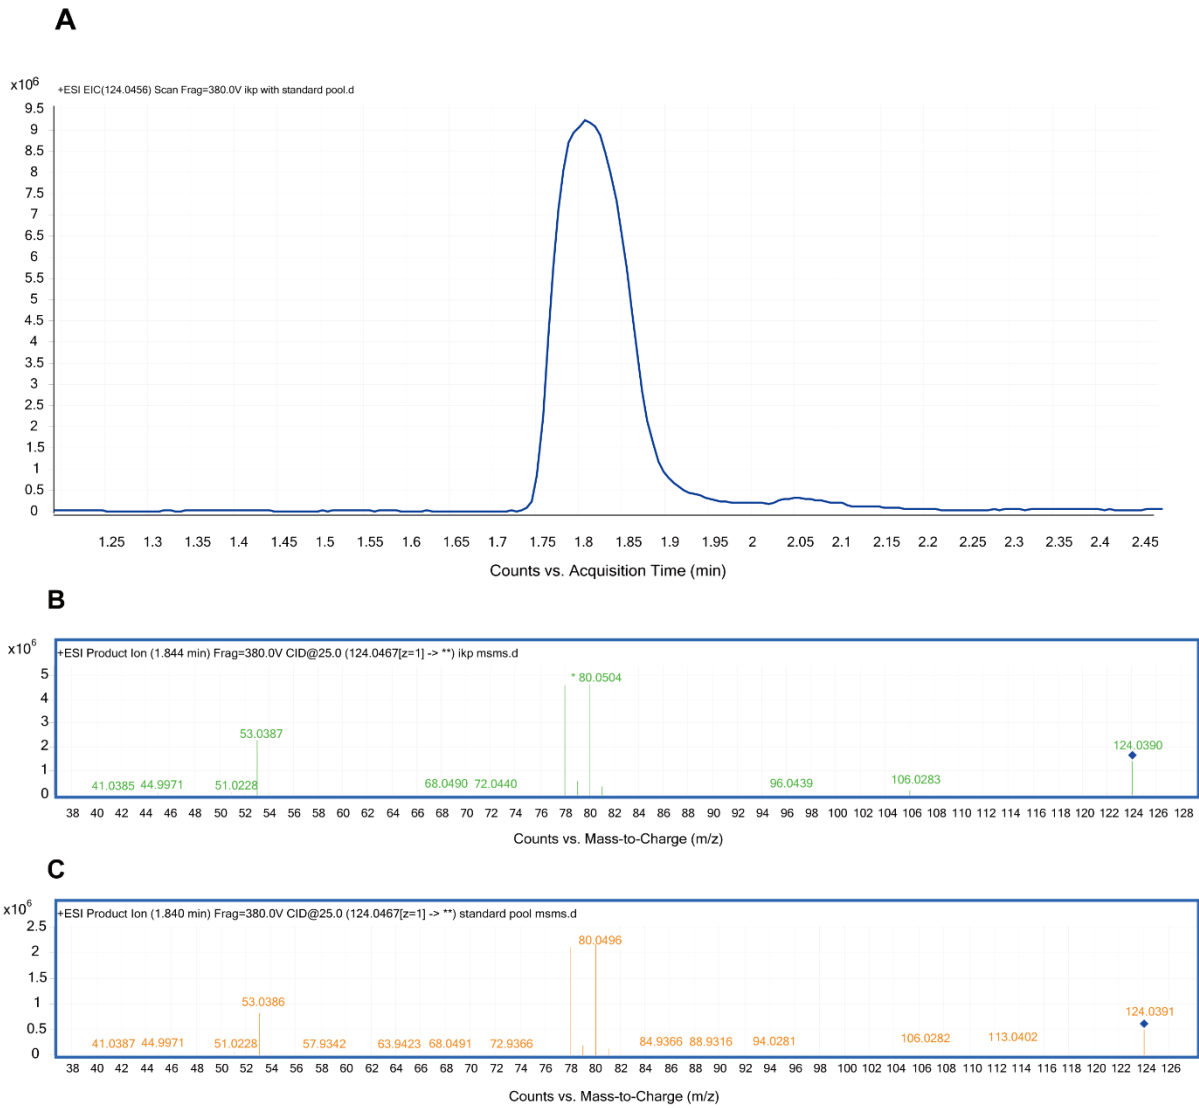

**Figure S4. Nicotinic acid identification.** A. Co-elution of nicotinic acid standard compound and representative contaminated MSC samples. B. MS/MS spectrum of metabolite  $m/z$  123.0366 in representative contaminated MSC sample. C. MS/MS spectrum standard compound nicotinic acid. MS/MS fragment masses for both compounds are the same ( $m/z$  80.0496,  $m/z$  78.0833,  $m/z$  53.0386).

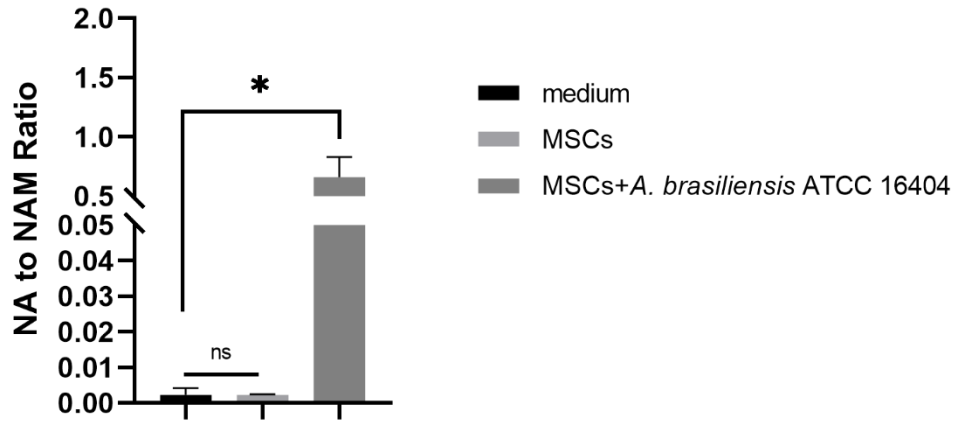

**Figure S5. NA to NAM ratio for uncontaminated and contaminated MSC culture medium by *A. brasiliensis*.** With an inoculation condition of 10 CFU/mL for 72 h, the ratio of NA to NAM in contaminated MSC culture medium was 200 times higher than the uncontaminated MSC culture medium. \* $p < 0.05$  compared to uncontaminated MSCs group using t-test.

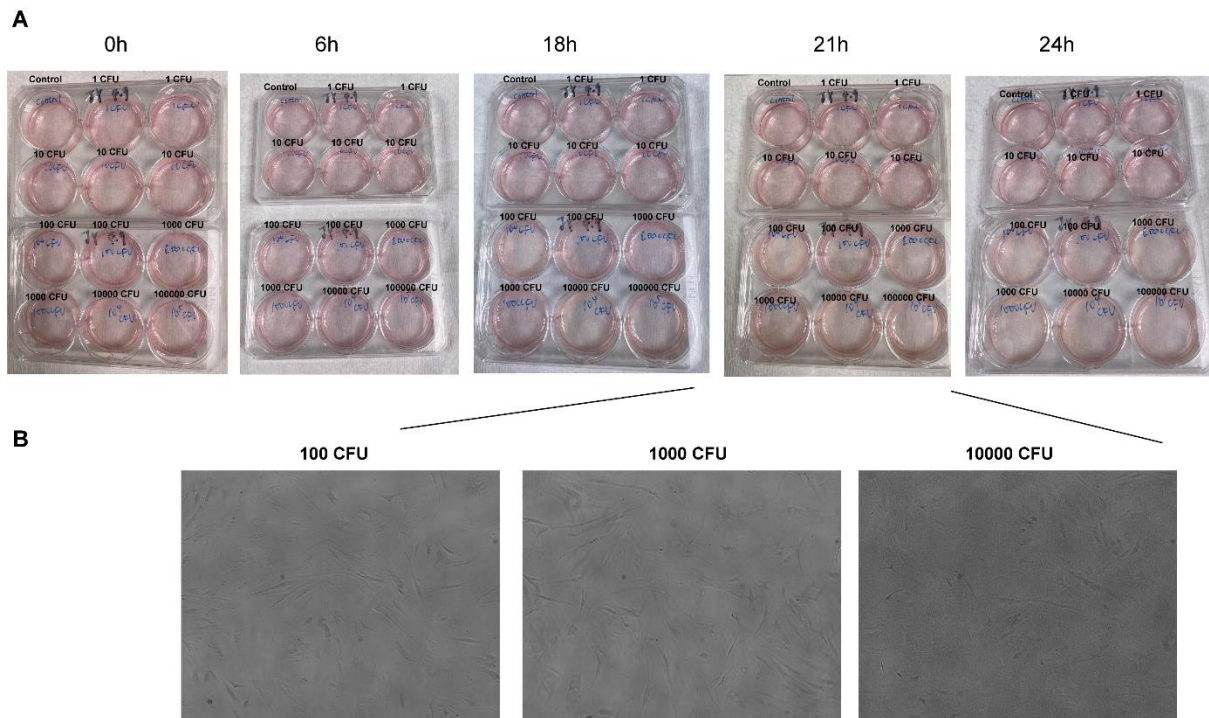

**Figure S6. (A) Medium changes after MSCs have been contaminated with different numbers of *E. coli* at 0 h, 6 h, 18 h, 21 h and 24 h. (B) Cell morphology observation after 21 h incubation. Magnification was 4 X in all panels.**

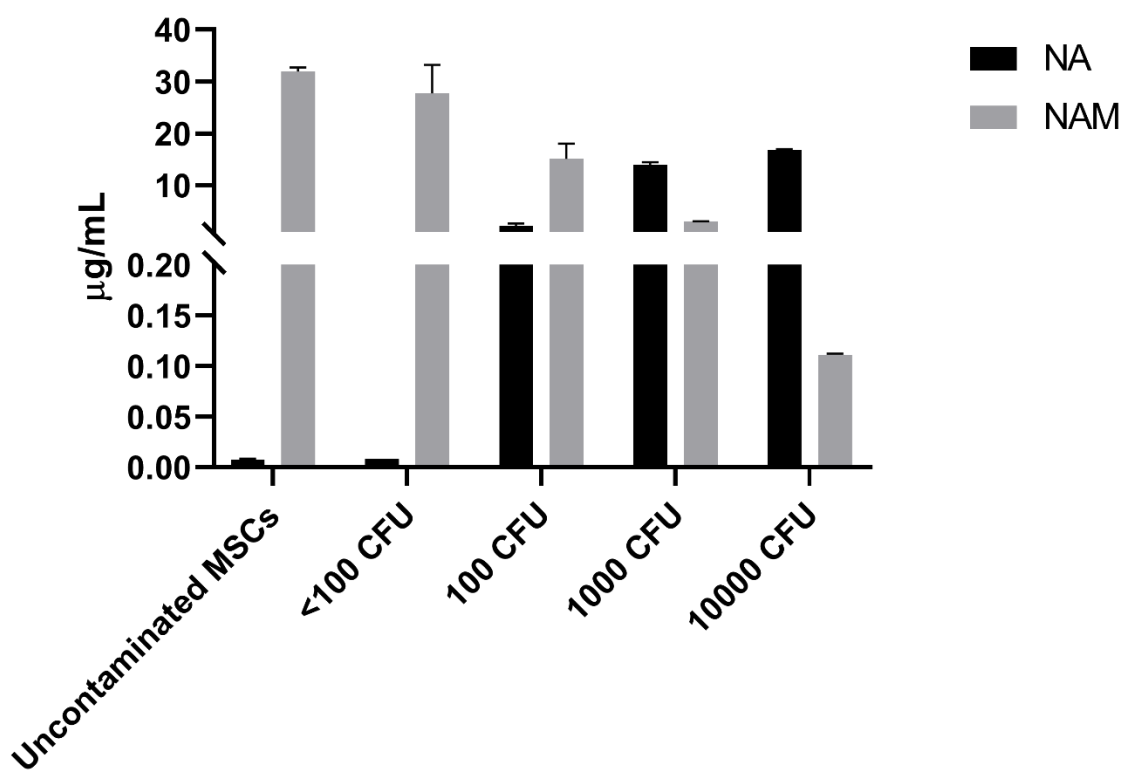

**Figure S7. Absolute quantification of NA and NAM amount in uncontaminated and *E. coli*-contaminated MSCs.** In uncontaminated MSCs or MSCs contaminated by <100 CFU/mL of *E. coli* for 24 h, the amount of NA was lower than 0.0002 µg/mL. After the cells were contaminated with 100, 1000 and 10000 CFU/mL of *E. coli*, the amount of NA increased to a highest amount of 16.60 µg/mL while NAM decreased from 31.93 in uncontaminated MSCs to a lowest amount of 0.12 µg/mL.

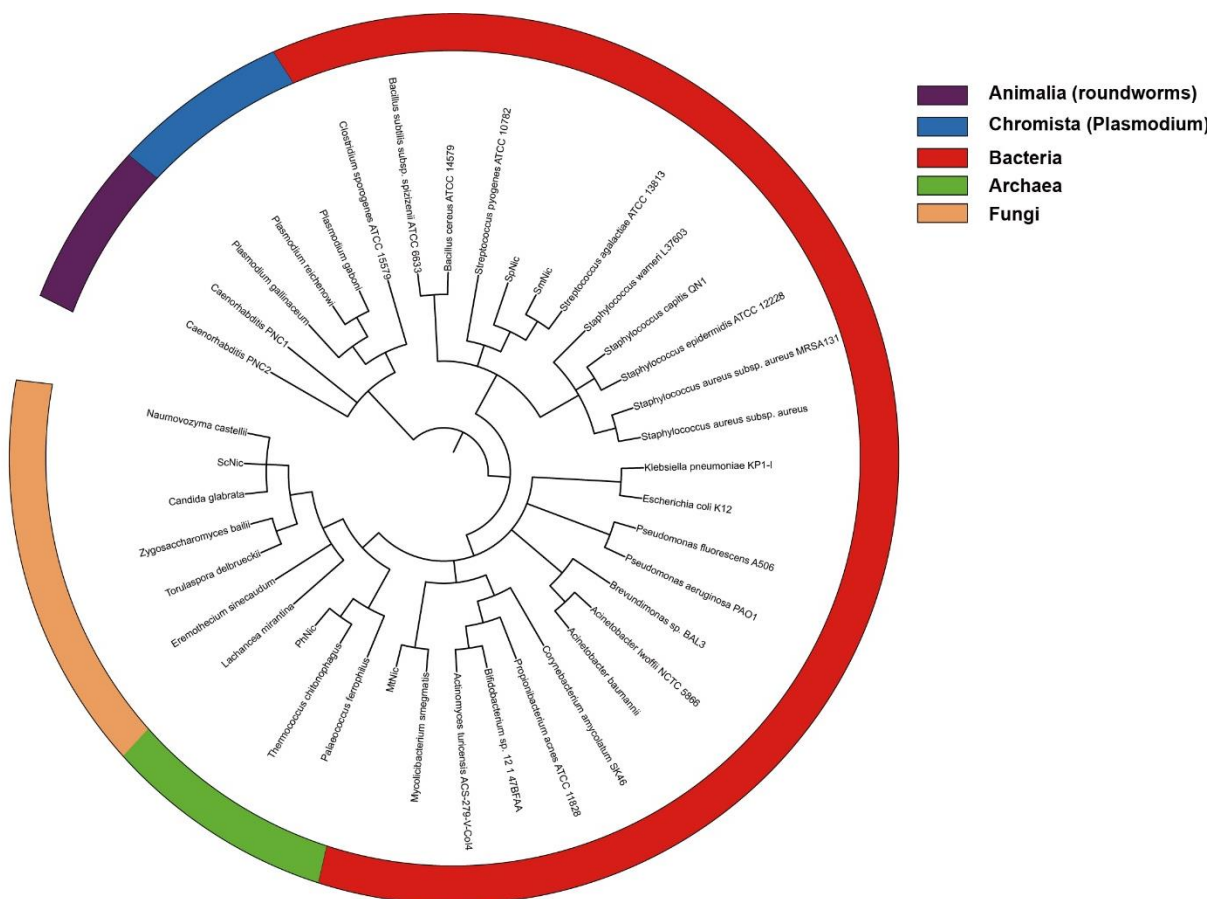

**Figure S8.** Phylogenetic analysis of nicotinamidases distributed in different kingdoms.

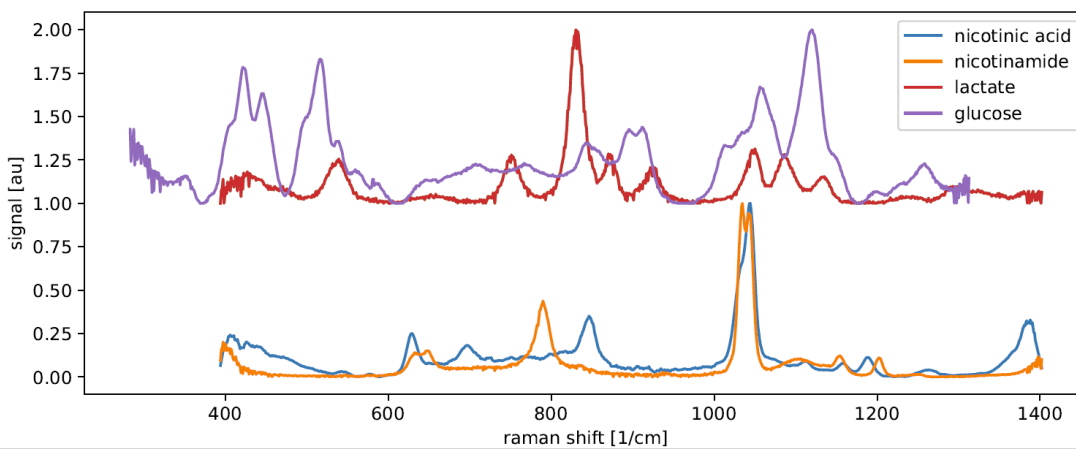

**Figure S9.** Raman spectra of nicotinic acid, nicotinamide, lactate and glucose with a concentration of 100 mM.

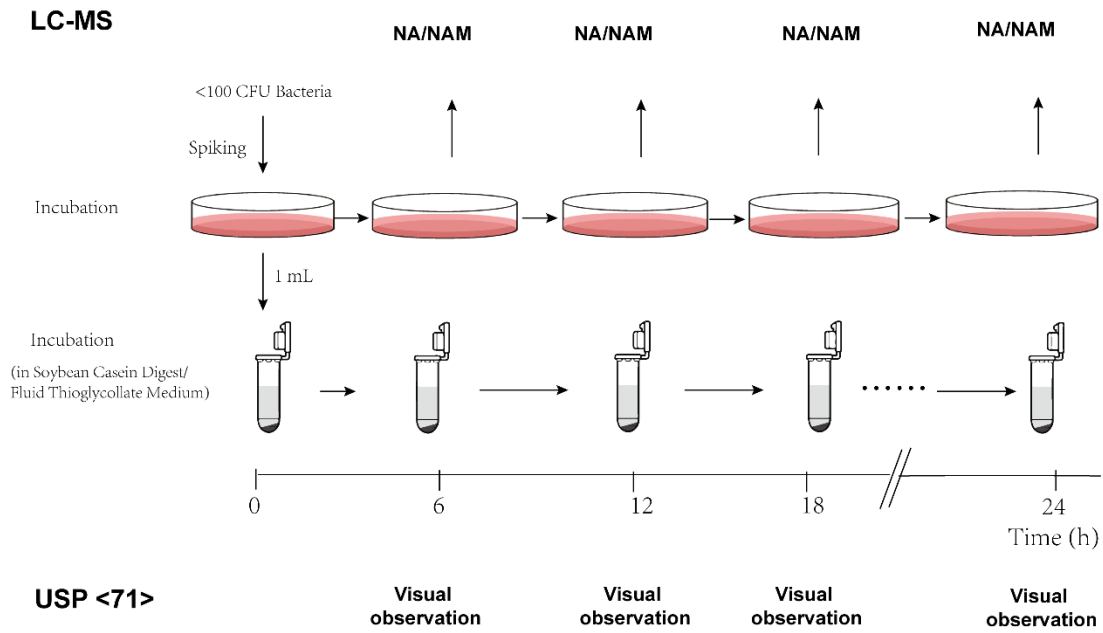

**Figure S10.** Experimental flow of the comparison study of USP <71> sterility test and NA/NAM ratio detection method.

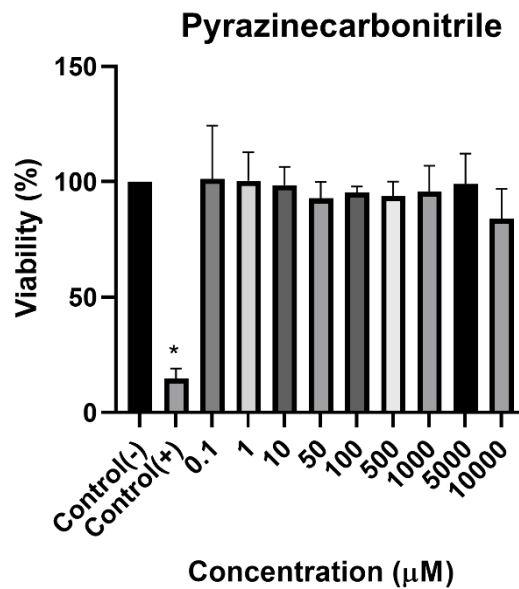

**Figure S11.** Cytotoxicity assay of pyrazinecarbonitrile using MTT. Cell viability in MSCs after incubating with different concentrations of pyrazinecarbonitrile (0.1- 10000  $\mu\text{M}$ ) were measured. 0.1% Triton X-100 and PBS were used as positive (+) and negative (-) controls, respectively. \*  $p < 0.05$ .



**Table S1. List of potential compounds that are found in five out of the six bacterial cultures**

| <b>Compound (m/z) @ Retention Time (min)</b> | <i>A. baumannii</i> | <i>S. epidermidis</i> | <i>E. coli</i> | <i>K. pneumoniae</i> | <i>P. aeruginosa</i> | <i>S. aureus</i> |
|----------------------------------------------|---------------------|-----------------------|----------------|----------------------|----------------------|------------------|
| 244.0765@1.6811303                           |                     |                       |                |                      |                      |                  |
| 72.061@2.764208                              |                     |                       |                |                      |                      |                  |
| 143.9923@2.765261                            |                     |                       |                |                      |                      |                  |
| 223.0908@7.1428566                           |                     |                       |                |                      |                      |                  |
| 119.0783@9.38                                |                     |                       |                |                      |                      |                  |
| 188.0507@9.68885                             |                     |                       |                |                      |                      |                  |
| 1381.2642@13.5265                            |                     |                       |                |                      |                      |                  |
| 1380.7632@13.534416                          |                     |                       |                |                      |                      |                  |
| 169.0904@4.4611306                           |                     |                       |                |                      |                      |                  |
| 230.1693@1.4843045                           |                     |                       |                |                      |                      |                  |
| 236.1232@6.0229588                           |                     |                       |                |                      |                      |                  |
| 230.1698@7.2533593                           |                     |                       |                |                      |                      |                  |
| 254.0969@1.4002401                           |                     |                       |                |                      |                      |                  |
| 155.1359@5.602751                            |                     |                       |                |                      |                      |                  |
| 120.0367@1.79728                             |                     |                       |                |                      |                      |                  |
| 95.0408@1.8315998                            |                     |                       |                |                      |                      |                  |
| 347.0718@1.8693602                           |                     |                       |                |                      |                      |                  |
| 274.1351@2.31796                             |                     |                       |                |                      |                      |                  |
| 541.071@3.4601786                            |                     |                       |                |                      |                      |                  |
| 576.9808@3.4596999                           |                     |                       |                |                      |                      |                  |
| 523.061@3.459862                             |                     |                       |                |                      |                      |                  |
| 717.0418@3.4603913                           |                     |                       |                |                      |                      |                  |
| 72.0609@3.4681602                            |                     |                       |                |                      |                      |                  |
| 247.0762@3.9413202                           |                     |                       |                |                      |                      |                  |
| 300.996@3.9413204                            |                     |                       |                |                      |                      |                  |
| 612.1671@4.05836                             |                     |                       |                |                      |                      |                  |
| 153.0834@4.145875                            |                     |                       |                |                      |                      |                  |
| 271.1247@4.774696                            |                     |                       |                |                      |                      |                  |
| 312.0972@4.8290434                           |                     |                       |                |                      |                      |                  |
| 275.1086@5.4727197                           |                     |                       |                |                      |                      |                  |
| 478.1901@5.771307                            |                     |                       |                |                      |                      |                  |
| 434.1363@6.3728266                           |                     |                       |                |                      |                      |                  |
| 126.0363@6.9101605                           |                     |                       |                |                      |                      |                  |
| 446.1728@8.01948                             |                     |                       |                |                      |                      |                  |
| 265.1021@9.9045                              |                     |                       |                |                      |                      |                  |
| 214.1385@9.9626                              |                     |                       |                |                      |                      |                  |
| 196.1275@9.963601                            |                     |                       |                |                      |                      |                  |
| 154.0684@10.94016                            |                     |                       |                |                      |                      |                  |
| 161.048@1.445739                             |                     |                       |                |                      |                      |                  |

\*The yellow highlight means that the compound is present in the corresponding bacterial culture.

**Table S2. List of potential compounds that are found in four out of the six bacterial cultures**

| <b>Compound (m/z) @ Retention Time (min)</b> | <i>A. baumannii</i> | <i>S. epidermidis</i> | <i>E. coli</i> | <i>K. pneumoniae</i> | <i>P. aeruginosa</i> | <i>S. aureus</i> |
|----------------------------------------------|---------------------|-----------------------|----------------|----------------------|----------------------|------------------|
| 203.1333@3.128478                            |                     |                       |                |                      |                      |                  |
| 54.0497@3.4657829                            |                     |                       |                |                      |                      |                  |
| 296.1068@4.991041                            |                     |                       |                |                      |                      |                  |
| 429.1376@9.892653                            |                     |                       |                |                      |                      |                  |
| 582.2585@15.691308                           |                     |                       |                |                      |                      |                  |
| 1712.8005@13.702173                          |                     |                       |                |                      |                      |                  |
| 650.006@12.755184                            |                     |                       |                |                      |                      |                  |
| 657.3338@12.756331                           |                     |                       |                |                      |                      |                  |
| 649.6718@12.760821                           |                     |                       |                |                      |                      |                  |
| 287.2033@2.2533479                           |                     |                       |                |                      |                      |                  |

\*The blue highlight means that the compound is present in the corresponding bacterial culture.

**Table S3. The calibration curve parameters, LOD, LOQ of two internal standard compounds**

|                                   | Linear range (µg/mL) | Correlation coefficient (r <sup>2</sup> ) | Slope              | y-intercept | LOD (ng/mL) | LOQ (ng/mL) | Recovery (%) |
|-----------------------------------|----------------------|-------------------------------------------|--------------------|-------------|-------------|-------------|--------------|
| NA- <sup>13</sup> C <sub>6</sub>  | 0.0001-0.5           | 0.9998                                    | 4×10 <sup>-7</sup> | 87596       | 0.93        | 3.11        | 107.5        |
| NAM- <sup>13</sup> C <sub>6</sub> | 0.005-0.75           | 0.9943                                    | 3×10 <sup>-7</sup> | 32587       | 5.89        | 19.65       | 102.5        |

\*LOD: Limit-Of-Detection; LOQ: Limit-Of-Quantification

**Table S4. Validation of the intra- and inter-day accuracies of two standard compounds at low, medium, and high concentrations.**

| Compounds                                    | Spiked concentration (ng/mL) | Intra-day (n=6)                             |                                |                           | Inter-day (n=18)                            |                                |                           |
|----------------------------------------------|------------------------------|---------------------------------------------|--------------------------------|---------------------------|---------------------------------------------|--------------------------------|---------------------------|
|                                              |                              | Observed concentration (ng/mL) <sup>a</sup> | Precision RSD (%) <sup>b</sup> | Accuracy (%) <sup>c</sup> | Observed concentration (ng/mL) <sup>a</sup> | Precision RSD (%) <sup>b</sup> | Accuracy (%) <sup>c</sup> |
| Nicotinic acid- <sup>13</sup> C <sub>6</sub> | 9                            | 9.001 ± 0.050                               | 0.553                          | 0.007                     | 9.259 ± 0.268                               | 2.890                          | 2.886                     |
|                                              | 60                           | 60.433 ± 0.237                              | 0.392                          | 0.721                     | 63.746 ± 2.703                              | 4.241                          | 6.244                     |
|                                              | 400                          | 406.577 ± 1.641                             | 0.403                          | 1.644                     | 418.0094 ± 12.298                           | 2.942                          | 4.502                     |
| Nicotinamide- <sup>13</sup> C <sub>6</sub>   | 6                            | 6.003 ± 0.028                               | 0.465                          | 0.061                     | 6.000 ± 0.060                               | 1.000                          | 0.001                     |
|                                              | 60                           | 60.728 ± 0.453                              | 0.747                          | 1.213                     | 61.264 ± 1.222                              | 1.994                          | 2.108                     |
|                                              | 600                          | 596.854 ± 3.896                             | 0.652                          | -0.524                    | 591.102 ± 5.997                             | 1.014                          | -1.483                    |

<sup>a</sup> Mean ± Standard Deviation (SD). <sup>b</sup> Relative Standard Deviation (RSD) % = (SD/mean) × 100. <sup>c</sup> [(mean observed concentration – spiked concentration)/spiked concentration] × 100.
